# Supplementary material for: Screening transition metal electrodes for achieving near 100% selectivity to urea via electroreduction of NO3− and CO2 at 100 mA cm−2 current density
Source: Royal Society of Chemistry journal article supplement (doi:10.1039/d4se00841c), 2024-10-21
Supplement: d4se00841c1.pdf [file d4se00841c1.pdf]

## Supporting Information for

# Screening Transition Metal Electrodes for Achieving near 100% Selectivity to Urea via Electroreduction of $\text{NO}_3^-$ and $\text{CO}_2$ at 100 $\text{mA}/\text{cm}^2$ Current Density

Nishithan C. Kani<sup>a#</sup>, Ishita Goyal<sup>a#</sup>, Samuel Olusegun<sup>b</sup>, Sreenivasulu Chinnabattigalla<sup>c</sup>, Rajan R. Bhawnani<sup>a</sup>, Ksenija D. Glusac<sup>c, d</sup>, Joseph A. Gauthier<sup>b\*</sup>, and Meenesh R. Singh<sup>a\*</sup>

<sup>a</sup> Department of Chemical Engineering, University of Illinois Chicago, Chicago, IL 60607, United States.

<sup>b</sup> Department of Chemical Engineering, Texas Tech University, Lubbock, TX 79409, United States

<sup>c</sup> Department of Chemistry, University of Illinois Chicago, Chicago, IL 60607, United States

<sup>d</sup> Chemical Sciences and Engineering Division, Argonne National Laboratory, Lemont, Illinois 60439, United States.

# Authors contributed equally

\* Corresponding Authors

### \*Corresponding Authors:

Prof. Meenesh R. Singh, Email: [mrsingh@uic.edu](mailto:mrsingh@uic.edu)

Prof. Joseph A. Gauthier, Email: [Joe.Gauthier@ttu.edu](mailto:Joe.Gauthier@ttu.edu)

**Keywords:** Electrochemical urea synthesis, Electrochemical nitrate reduction, Electrochemical  $\text{CO}_2$  reduction, Nitrate removal, Electrochemical C-N coupling.

**Table S1:** Literature comparison of the urea FE and yield/current density.

| Sr.No. | Catalyst                                  | Reactants                                     | Electrolyte                                       | Urea FE                    | Urea Yield/Current Density                                  | Reference     |
|--------|-------------------------------------------|-----------------------------------------------|---------------------------------------------------|----------------------------|-------------------------------------------------------------|---------------|
| 1      | BiFeO <sub>3</sub> /BiVO <sub>4</sub>     | N <sub>2</sub> /CO <sub>2</sub>               | 0.1 M KHCO <sub>3</sub>                           | 17.18 % at -0.4 V vs. RHE  | -0.24 mA/cm <sup>2</sup> at -0.4 V vs. RHE                  | <sup>1</sup>  |
| 2      | Bi-BiVO <sub>4</sub>                      | N <sub>2</sub> /CO <sub>2</sub>               | 0.1 M KHCO <sub>3</sub>                           | 12.55 % at -0.4 V vs. RHE  | -0.29 mA/cm <sup>2</sup> at -0.4 V vs. RHE                  | <sup>2</sup>  |
| 3      | Te-Pd NCs                                 | NO <sub>2</sub> <sup>-</sup> /CO <sub>2</sub> | 0.1 M KHCO <sub>3</sub> /0.05 M KNO <sub>2</sub>  | 12.2 % at -1.1 V vs. RHE   | ~-0.976 mA/cm <sup>2</sup> at -1.1 V vs. RHE                | <sup>3</sup>  |
| 4      | Ni phthalocyanine/GDE                     | NO <sub>2</sub> <sup>-</sup> /CO <sub>2</sub> | 0.2 M KHCO <sub>3</sub> /0.02 M KNO <sub>2</sub>  | 40 % at -1.5 V vs. SHE     | -26 mA/cm <sup>2</sup> at -1.5 V vs. SHE                    | <sup>4</sup>  |
| 5      | Single atom Cu                            | NO <sub>3</sub> <sup>-</sup> /CO <sub>2</sub> | 0.1 M KHCO <sub>3</sub> /0.1 M KNO <sub>3</sub>   | 28 % at -0.9 V vs. RHE     | -27 mA/cm <sup>2</sup> at -0.9 V vs. RHE                    | <sup>5</sup>  |
| 6      | Ag-GDE                                    | NO <sub>2</sub> <sup>-</sup> /CO <sub>2</sub> | 0.2 M KHCO <sub>3</sub> /0.02 M KNO <sub>2</sub>  | 38% at -1 V vs. SHE        | ~-3 mA/cm <sup>2</sup> at -1 V vs. SHE                      | <sup>6</sup>  |
| 7      | Indium oxyhydroxide                       | NO <sub>3</sub> <sup>-</sup> /CO <sub>2</sub> | 0.1 M KNO <sub>3</sub>                            | 51 % at -0.5 V vs. RHE     | -0.43 mA/cm <sup>2</sup> at -0.5 V vs. RHE                  | <sup>7</sup>  |
| 8      | Indium hydroxide                          | NO <sub>3</sub> <sup>-</sup> /CO <sub>2</sub> | 0.1 M KNO <sub>3</sub>                            | 53.4 % at -0.6 V vs. RHE   | -0.36 mA/cm <sup>2</sup> at -0.6 V vs. RHE                  | <sup>8</sup>  |
| 9      | Zn/GDE                                    | NO <sub>3</sub> <sup>-</sup> /CO <sub>2</sub> | 0.2 M KHCO <sub>3</sub> /0.02 M KNO <sub>3</sub>  | 35 % at -1.75 V vs. RHE    | NR                                                          | <sup>9</sup>  |
| 10     | ZnO porous nano sheets                    | NO <sub>2</sub> <sup>-</sup> /CO <sub>2</sub> | 0.2 M NaHCO <sub>3</sub> /0.1 M NaNO <sub>2</sub> | 23.26 % at -0.79 V vs. RHE | -27 mA/cm <sup>2</sup> at -0.79 V vs. RHE                   | <sup>10</sup> |
| 11     | PdCu nanoalloy loaded on TiO <sub>2</sub> | N <sub>2</sub> /CO <sub>2</sub>               | NR                                                | 8.92% at -0.4 V vs. RHE    | 3.36 mmol g <sup>-1</sup> h <sup>-1</sup> at -0.4 V vs. RHE | <sup>11</sup> |
| 12     | ZnO Nanosheets                            | NO/CO <sub>2</sub>                            | 0.2 M KHCO <sub>3</sub>                           | 11.26% at -0.92V vs. RHE   | -40 mA/ cm <sup>-2</sup> at -0.92V vs. RHE                  | <sup>12</sup> |

|    |                                           |                                               |                                                     |                            |                                                |               |
|----|-------------------------------------------|-----------------------------------------------|-----------------------------------------------------|----------------------------|------------------------------------------------|---------------|
| 13 | PdCu nanoalloy loaded on TiO <sub>2</sub> | N <sub>2</sub> /CO <sub>2</sub>               | 0.1M KHCO <sub>3</sub>                              | 8.92% at -0.4 V vs. RHE    | -0.11 mA/cm <sup>2</sup> at -0.4 V vs. RHE     | <sup>13</sup> |
| 14 | Diatomic Fe-Ni                            | NO <sub>3</sub> <sup>-</sup> /CO <sub>2</sub> | 0.1 M KHCO <sub>3</sub> with 50 Mm KNO <sub>3</sub> | 17.8% at -1.5V vs. RHE     | -1.73 mA/cm <sup>2</sup> at -1.5 V vs. RHE     | <sup>14</sup> |
| 15 | Titania–Nafion Composite                  | CO <sub>2</sub> /NO <sub>3</sub> <sup>-</sup> | CO <sub>2</sub> -saturated 0.1m KNO <sub>3</sub>    | 40 % at -0.98 V vs Ag/AgCl | -0.18 mA/cm <sup>2</sup> at -0.98 V vs Ag/AgCl | <sup>15</sup> |
| 16 | copper phthalocyanine nanotubes           | N <sub>2</sub> /CO <sub>2</sub>               | 0.1 M KHCO <sub>3</sub>                             | 12.99% at -0.6 V vs RHE    | 143.47 μg h <sup>-1</sup> mg <sup>-1</sup>     | <sup>16</sup> |

**Table S2:** Details of the chemicals used for the current study.

| Sr No. | Chemicals                     | Purity (%)  | Catalog Number | Manufacturer               |
|--------|-------------------------------|-------------|----------------|----------------------------|
| 1      | Potassium Bicarbonate         | 99.7        | 237205         | Sigma Aldrich              |
| 2      | Potassium Nitrate             | 99.0        | 221295         | Sigma Aldrich              |
| 3      | Thiosemicarbazide             | 99          | T33405         | Sigma Aldrich              |
| 4      | 2, 3 - Butanedione Monoxime   | 98          | B0753          | Sigma Aldrich              |
| 5      | Phenol Nitroprusside solution | NA          | P6994          | Sigma Aldrich              |
| 6      | Sodium Hypochlorite solution  | NA          | 239305         | Sigma Aldrich              |
| 7      | Sulfuric Acid                 | 95.0 - 98.0 | 258105         | Sigma Aldrich              |
| 8      | Phosphoric Acid               | 85          | BDH3118        | BDH                        |
| 9      | Nitric Acid                   | 25          | 1.60317        | Sigma Aldrich              |
| 10     | Iron (III) Chloride           | 97          | 157740         | Sigma Aldrich              |
| 11     | Potassium Hydroxide           | 99.99       | 306568         | Sigma Aldrich              |
| 12     | Urea                          | 99.5        | 17131901       | Cytiva (GEH Life Sciences) |
| 13     | Ammonia Solution              | 25          | 105428         | Sigma Aldrich              |

|    |                    |        |        |       |
|----|--------------------|--------|--------|-------|
| 14 | Carbon Dioxide gas | 99.999 | UN1013 | Linde |
| 15 | Argon Gas          | 99.999 | UN1006 | Linde |

**Table S3:** Details of the materials used for the current study.

| Sr No. | Materials                                  | Purity (%) | Catalog Number | Manufacturer           |
|--------|--------------------------------------------|------------|----------------|------------------------|
| 1      | Silver Electrode                           | 99.999     | NA             | ACI Alloys             |
| 2      | Platinum Electrode                         | 99.999     | NA             | ACI Alloys             |
| 3      | Silver-Silver Chloride Reference Electrode | NA         | NA             | Innovative Instruments |
| 4      | Rigid Resin 10K                            | NA         | FLRG1001       | Formlabs               |
| 5      | Nafion Membrane                            | NA         | 274674         | Sigma                  |
| 6      | Iron Electrode                             | 99.999     | NA             | ACI Alloys             |
| 7      | Cobalt Electrode                           | 99.999     | NA             | ACI Alloys             |
| 8      | Nickel Electrode                           | 99.999     | NA             | ACI Alloys             |
| 9      | Copper Electrode                           | 99.999     | NA             | ACI Alloys             |
| 10     | Zinc Electrode                             | 99.999     | NA             | ACI Alloys             |
| 11     | Ruthenium Electrode                        | 99.999     | NA             | ACI Alloys             |
| 12     | Palladium Electrode                        | 99.999     | NA             | ACI Alloys             |
| 13     | Tungsten Electrode                         | 99.999     | NA             | ACI Alloys             |
| 14     | Rhenium Electrode                          | 99.999     | NA             | ACI Alloys             |
| 15     | Iridium Electrode                          | 99.999     | NA             | ACI Alloys             |
| 16     | Platinum Electrode                         | 99.999     | NA             | ACI Alloys             |
| 17     | Gold Electrode                             | 99.999     | NA             | ACI Alloys             |
| 18     | Indium Electrode                           | 99.999     | NA             | ACI Alloys             |

|    |                          |        |            |                              |
|----|--------------------------|--------|------------|------------------------------|
| 19 | Tin Electrode            | 99.999 | NA         | ACI Alloys                   |
| 20 | Lead Electrode           | 99.999 | NA         | ACI Alloys                   |
| 21 | Cobalt Sputtering Target | 99.999 | 91017-CO   | Electron Microscopy Sciences |
| 22 | Silver Sputtering Target | 99.999 | 91017-AG   | Electron Microscopy Sciences |
| 23 | Zinc Sputtering Target   | 99.999 | 91017-ZINC | Electron Microscopy Sciences |
| 24 | Copper Sputtering Target | 99.999 | 91017-CU   | Electron Microscopy Sciences |
| 25 | Carbon Substrate         | NA     | 4655-T060  | Fuel Cell Store              |

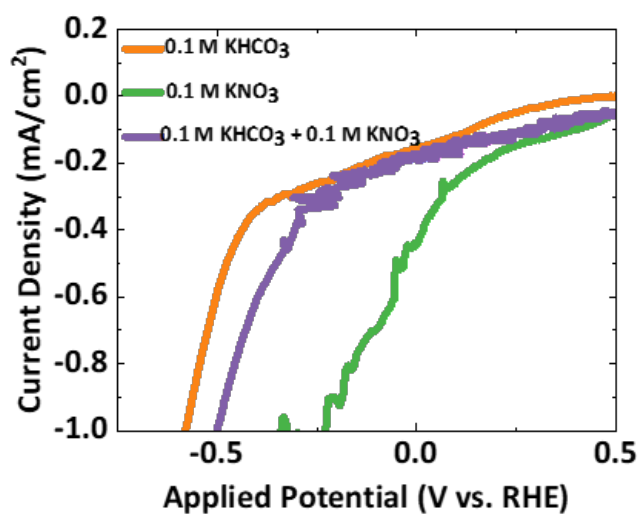

**Figure S1:** Linear sweep voltammetry (LSV) profiles for Ag cathode using different catholytes such as 0.1 M KHCO<sub>3</sub> (equilibrated with CO<sub>2</sub>), 0.1 M KNO<sub>3</sub> and a solution of 0.1 M KHCO<sub>3</sub> and 0.1 M KNO<sub>3</sub> (equilibrated with CO<sub>2</sub>).

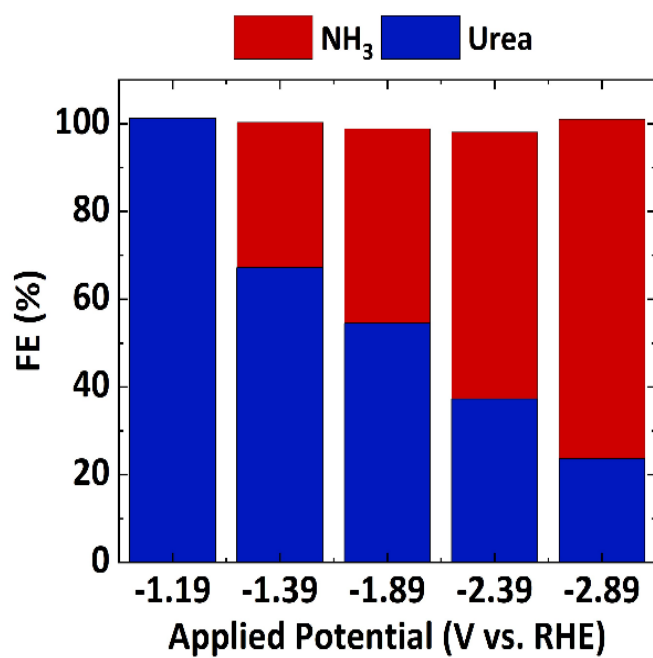

**Figure S2:**  $\text{NH}_3$  and Urea FE at high over potentials.

A

### Planar Electrode Configuration

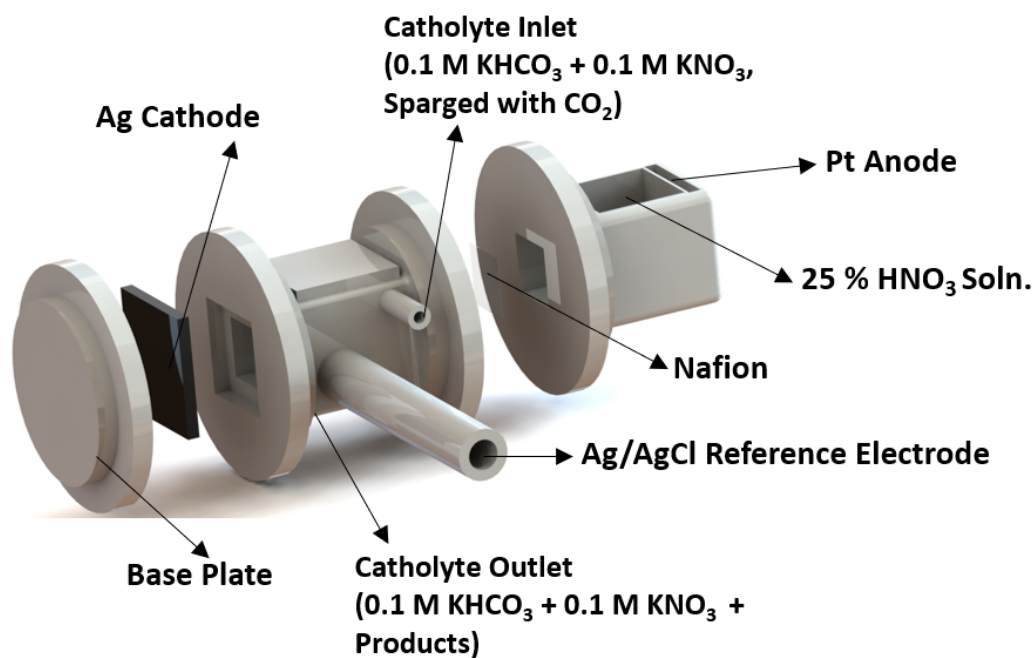

B

### GDE Configuration

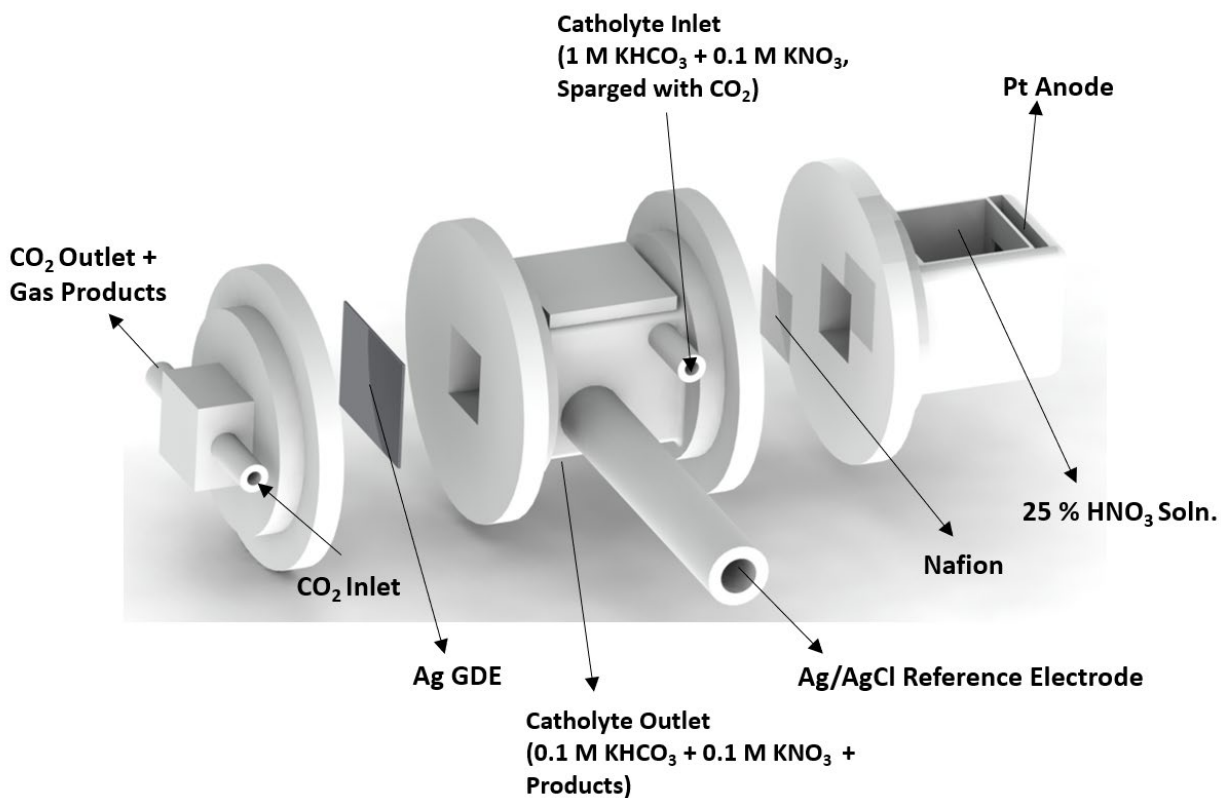

Figure S3: Reactor Schematic A) Planar Electrode Configuration. B) GDE Configuration.

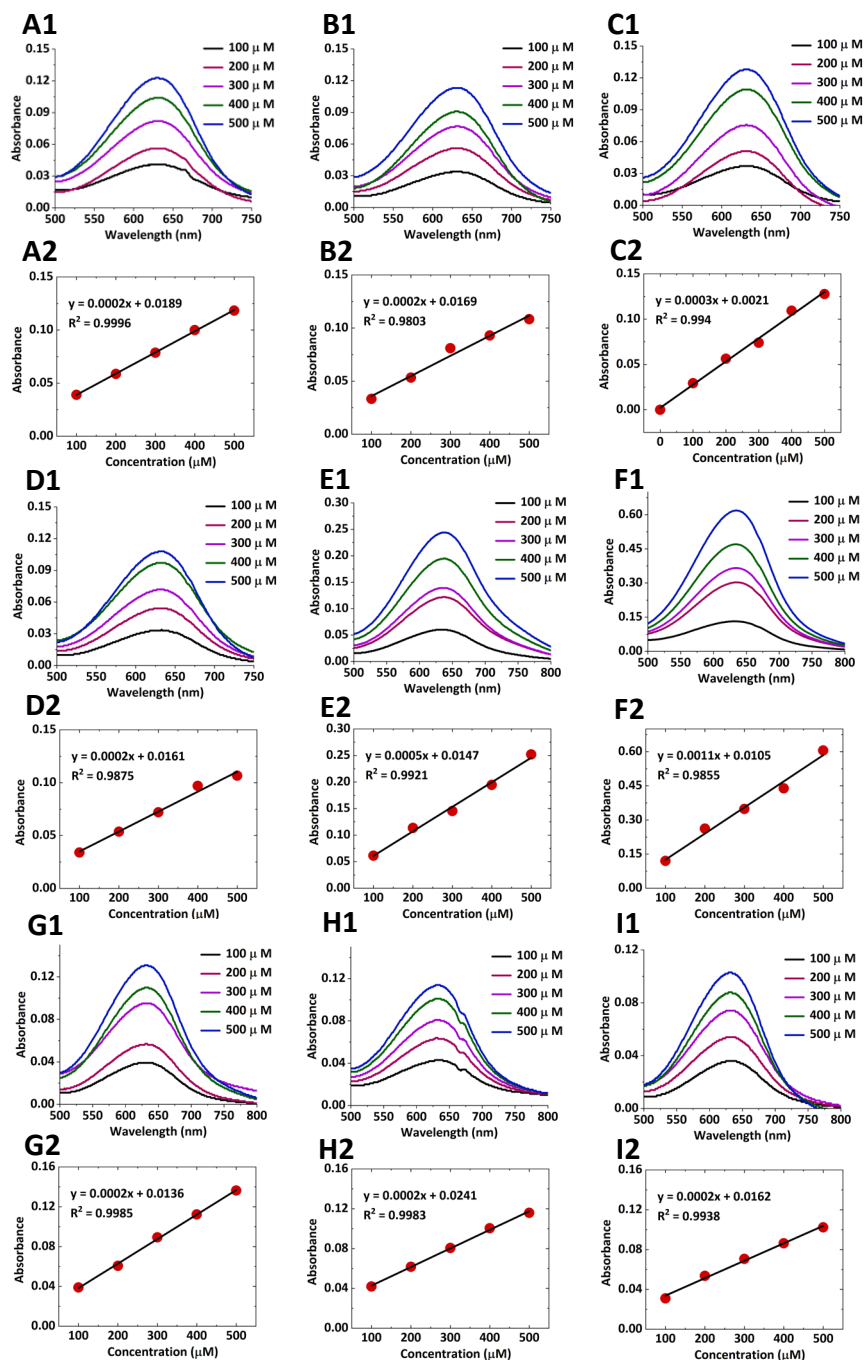

**Figure S4: NH<sub>3</sub> calibration graphs** Absorbance scans as a function of wavelengths. Absorbances as a function of NH<sub>3</sub> concentrations at 632 nm. Different concentrations of NH<sub>3</sub> are prepared in **A1, A2**) 1 M KNO<sub>3</sub> + 0.1 M KHCO<sub>3</sub> **B1, B2**) 0.5 M KNO<sub>3</sub> + 0.1 M KHCO<sub>3</sub> **C1, C2**) 0.1 M KNO<sub>3</sub> + 0.1 M KHCO<sub>3</sub> **D1, D2**) 0.01 M KNO<sub>3</sub> + 0.1 M KHCO<sub>3</sub> **E1, E2**) 0.001 M KNO<sub>3</sub> + 0.1 M KHCO<sub>3</sub> **F1, F2**) 0.1 M KNO<sub>3</sub> + 1 M KHCO<sub>3</sub> **G1, G2**) 0.1 M KNO<sub>3</sub> + 0.5 M KHCO<sub>3</sub> **H1, H2**) 0.1 M KNO<sub>3</sub> + 0.01 M KHCO<sub>3</sub> **I1, I2**) 0.1 M KNO<sub>3</sub> + 0.001 M KHCO<sub>3</sub>.



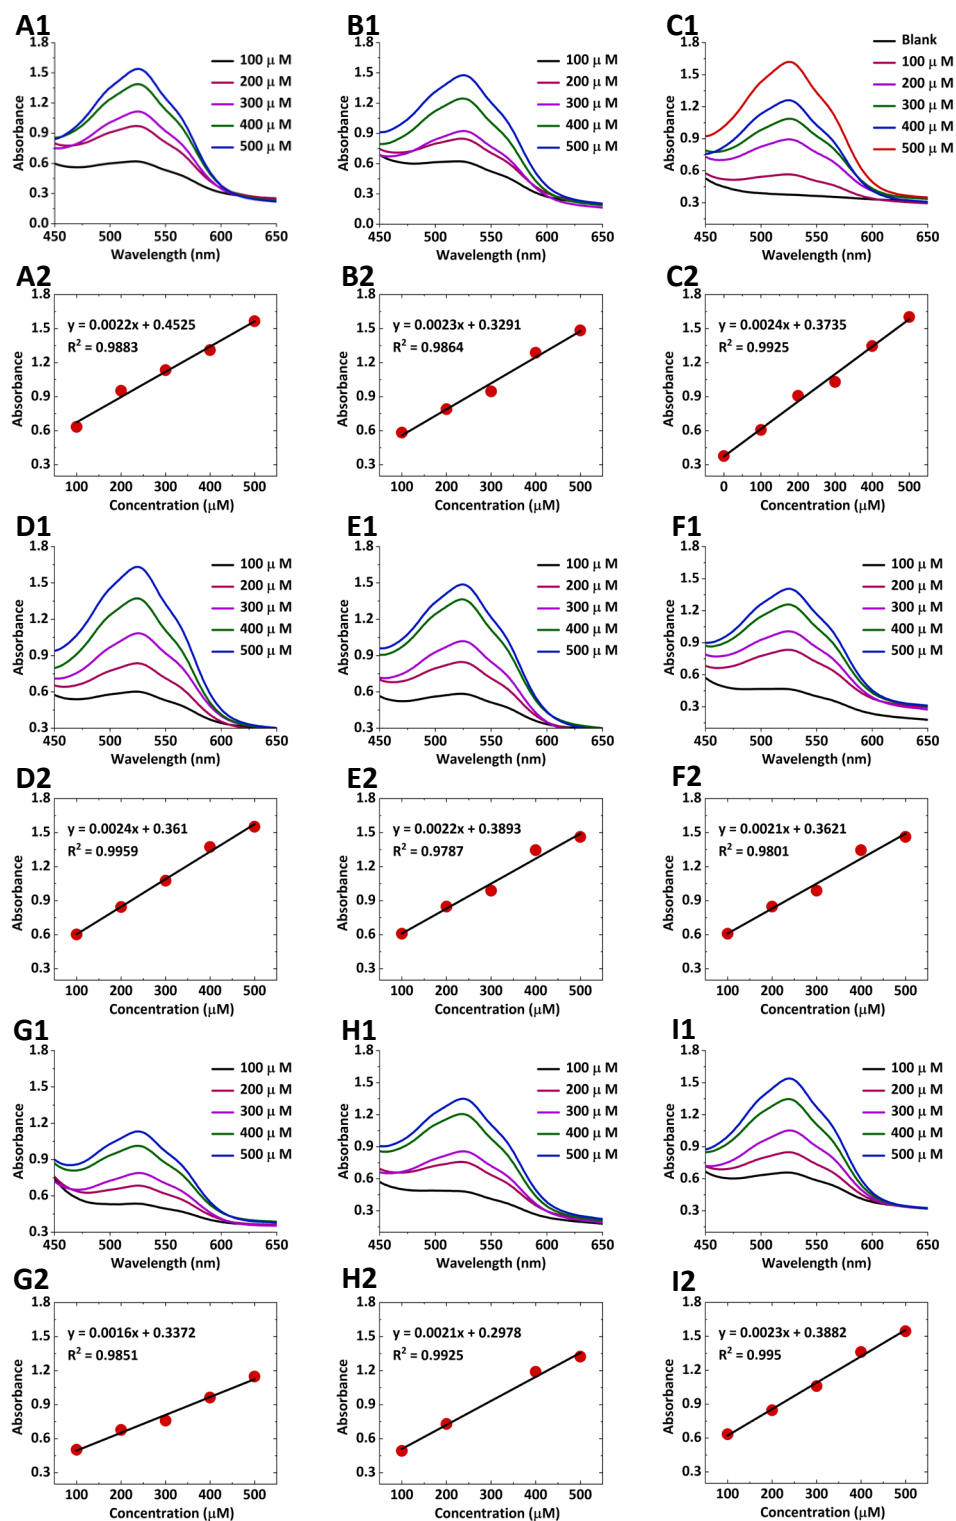

**Figure S5: Urea calibration graphs** Absorbance scans as a function of wavelengths. Absorbances as a function of urea concentrations at 525 nm. Different concentrations of urea were prepared in **A1, A2)** 1 M  $\text{KNO}_3$  + 0.1 M  $\text{KHCO}_3$  **B1, B2)** 0.5 M  $\text{KNO}_3$  + 0.1 M  $\text{KHCO}_3$  **C1, C2)** 0.1 M  $\text{KNO}_3$  + 0.1 M  $\text{KHCO}_3$  **D1, D2)** 0.01 M  $\text{KNO}_3$  + 0.1 M  $\text{KHCO}_3$  **E1, E2)** 0.001 M  $\text{KNO}_3$  + 0.1 M  $\text{KHCO}_3$  **F1, F2)** 0.1

M  $\text{KNO}_3$  + 1 M  $\text{KHCO}_3$  **G1, G2**) 0.1 M  $\text{KNO}_3$  + 0.5 M  $\text{KHCO}_3$  **H1, H2**) 0.1 M  $\text{KNO}_3$  + 0.01 M  $\text{KHCO}_3$  **I1, I2**) 0.1 M  $\text{KNO}_3$  + 0.001 M  $\text{KHCO}_3$ .

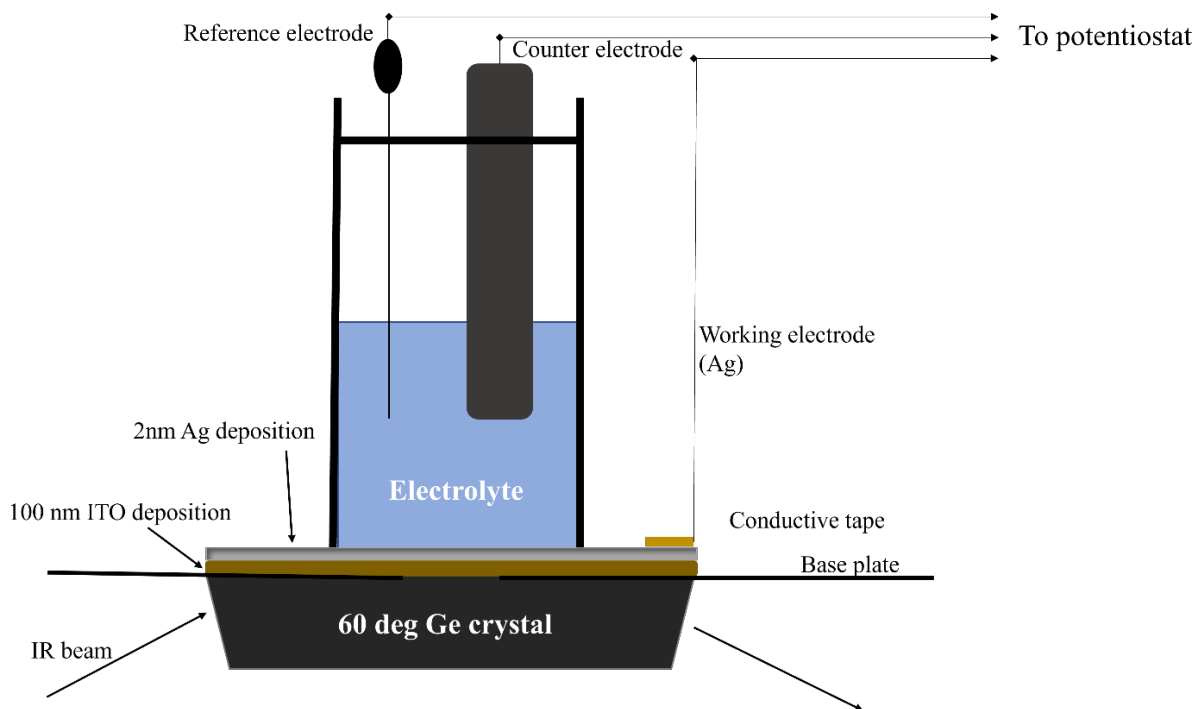

**Figure S6:** Schematic of the cell used for FTIR Studies

$\text{NH}_3$ , urea, formamide, and methyl amine are the possible nitrogen-containing products. Figure S7 denotes the FTIR spectra of reactants and products. All these products have strong signature peaks between wavenumbers 2500 and 3500  $\text{cm}^{-1}$ . The reactants  $\text{KHCO}_3$  and  $\text{KNO}_3$  do not have signatures in wavenumbers above 2000  $\text{cm}^{-1}$ . Hence, we can use those regions to get insights from the in-situ FTIR data. Urea has a strong signature band between 3300 and 3500  $\text{cm}^{-1}$ , corresponding to N-H stretching.  $\text{NH}_4\text{Cl}$  has the N-H stretching signature from 2800 to 3300  $\text{cm}^{-1}$ . Hence, urea and  $\text{NH}_3$  signatures can be easily distinguished from each other using the N-H stretching feature. Formamide has N-H stretching band in the same region as urea, and in addition, formamide has C-H stretching band between 2750 and 3000  $\text{cm}^{-1}$ , which is absent in urea. Hence, urea and formamide could be distinguished using the C-H stretching band. Methyl amine has a strong C-H stretching band between 2750 and 3000  $\text{cm}^{-1}$  but not a dominant N-H stretching band. Formamide and urea also have strong signatures corresponding to C=O stretching between 1500 and 1750  $\text{cm}^{-1}$ . C=O stretching is absent in  $\text{NH}_3$  and methyl amine. Methyl amine, urea, and formamide have C-N stretching features between 750 and 1500  $\text{cm}^{-1}$ , missing in  $\text{NH}_3$ . Hence, we can use these features to distinguish the products and analyze the in-situ FTIR data.

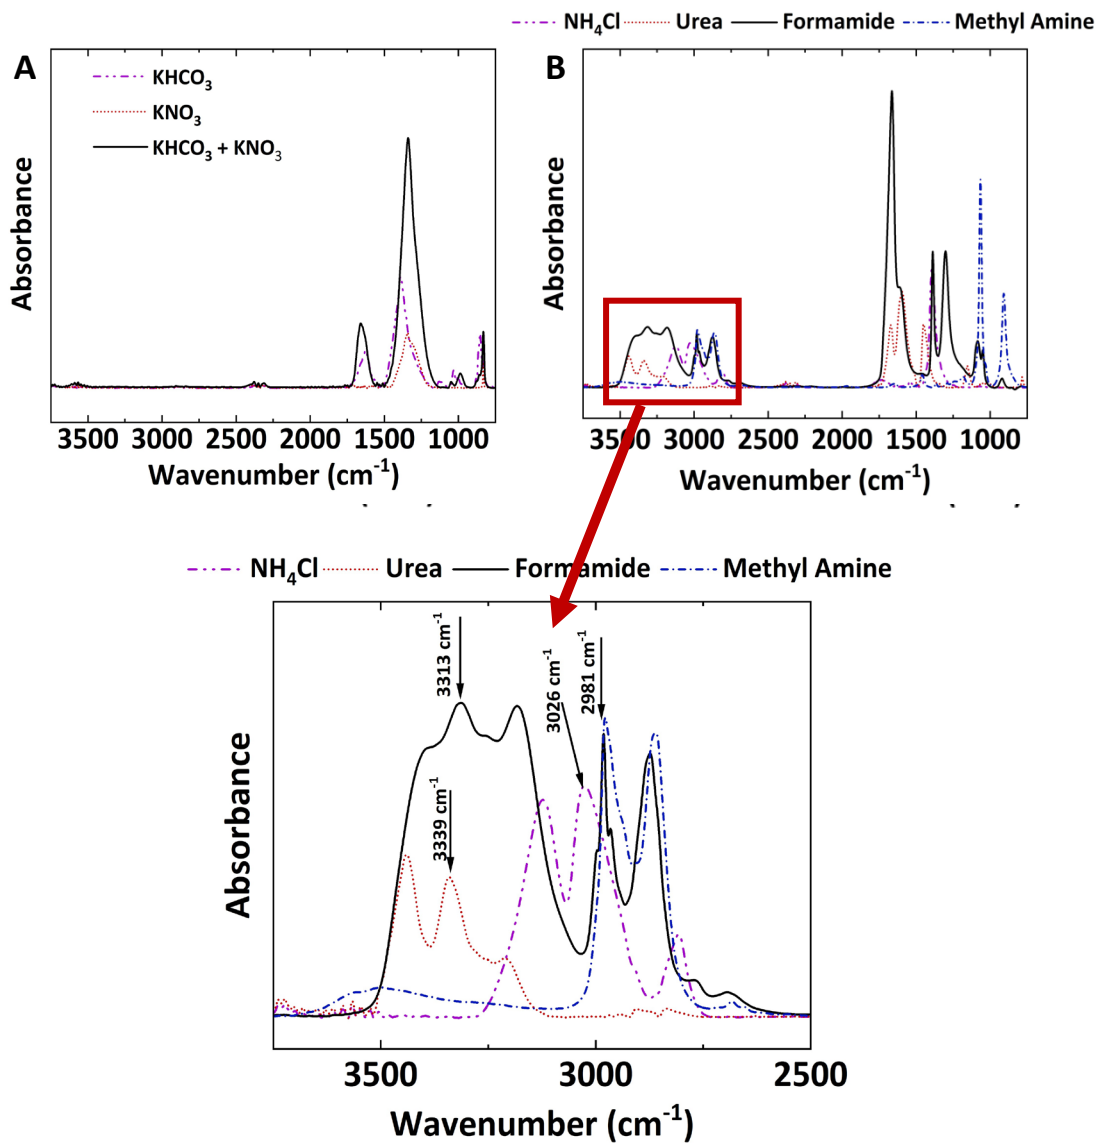

**Figure S7: Fourier Transform Infrared (FTIR) Spectroscopy** A) FTIR Spectra of reactants ( $\text{CO}_2$  sparged  $\text{KHCO}_3$  and  $\text{KNO}_3$ ). B) FTIR Spectra of possible products.

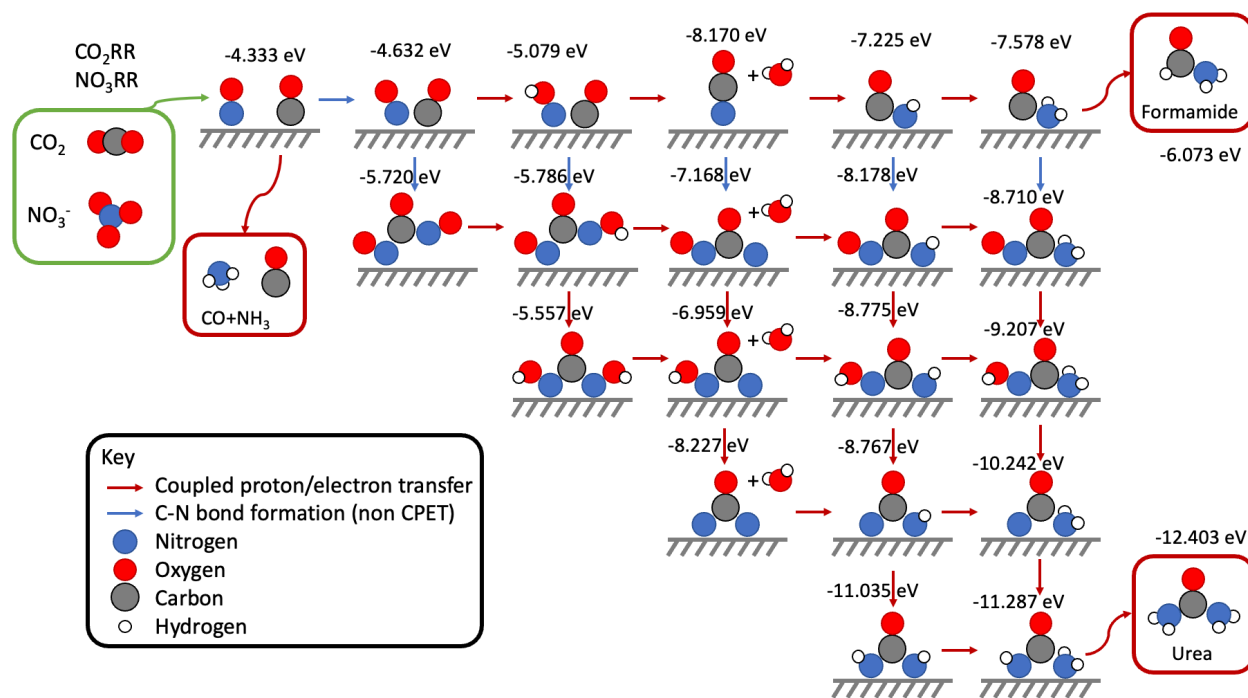

**Figure S8:** Possible pathways considered for the electrochemical urea synthesis from CO<sub>2</sub> and NO<sub>3</sub><sup>-</sup>.

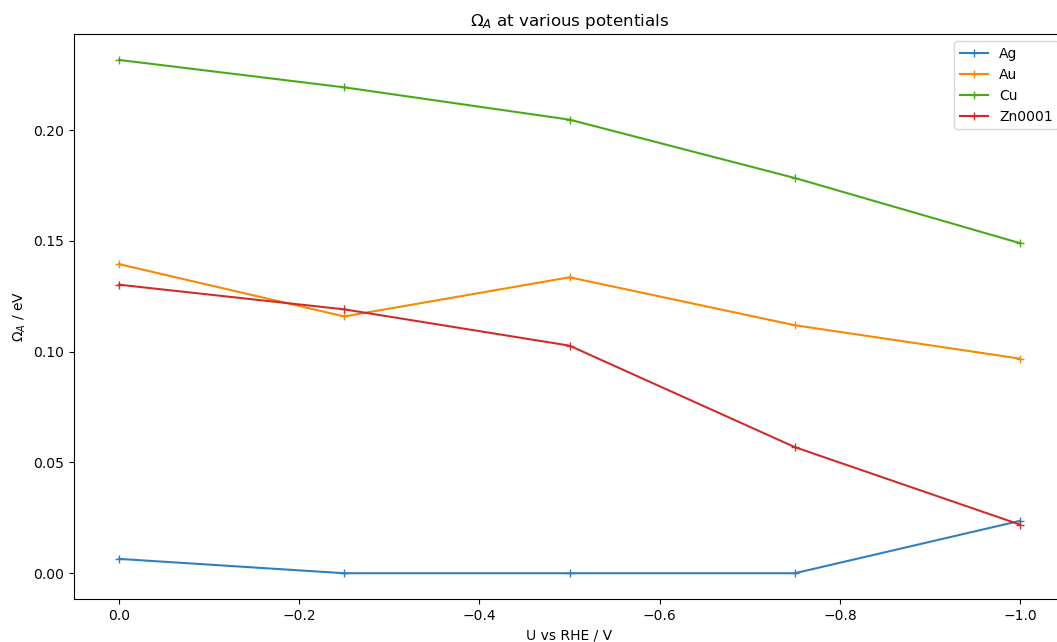

**Figure S9:** First C-N bond formation barrier on selected materials (\*CO + \*NO → \*CONO)

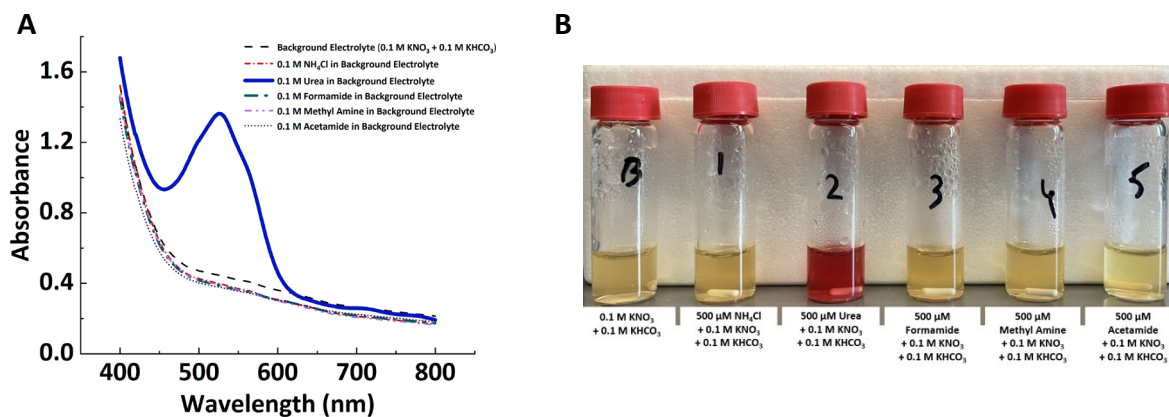

**Figure S10:** A) Absorbance as a function of wavelength for different possible products. B) Photograph of the color change when the reagents are added for the diacetylmonoxime method. Only urea shows the color change and other products donot show any change in color.

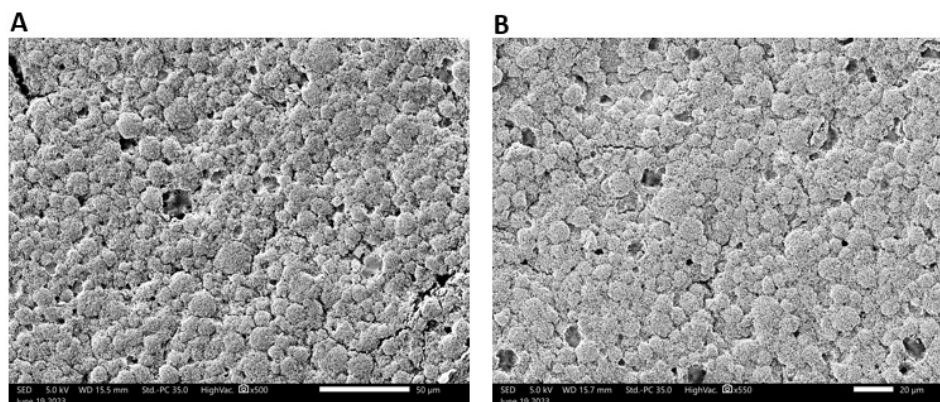

**Figure S11: Scanning Electron Microscopy (SEM)** A) SEM image of Ag GDE pre-electrolysis (50μm). B) SEM image of Ag GDE post-electrolysis (20 μm).

### The co-adsorption free energy of CO<sub>2</sub> and NO<sub>3</sub><sup>-</sup> :

The co-adsorption free energy of CO<sub>2</sub> and NO<sub>3</sub><sup>-</sup> will occur through two coupled proton-electron transfer step as shown in Eq S1. The co-adsorption free energy is calculated to be -0.83eV at 0 V vs. RHE

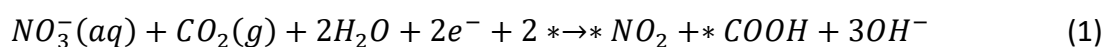

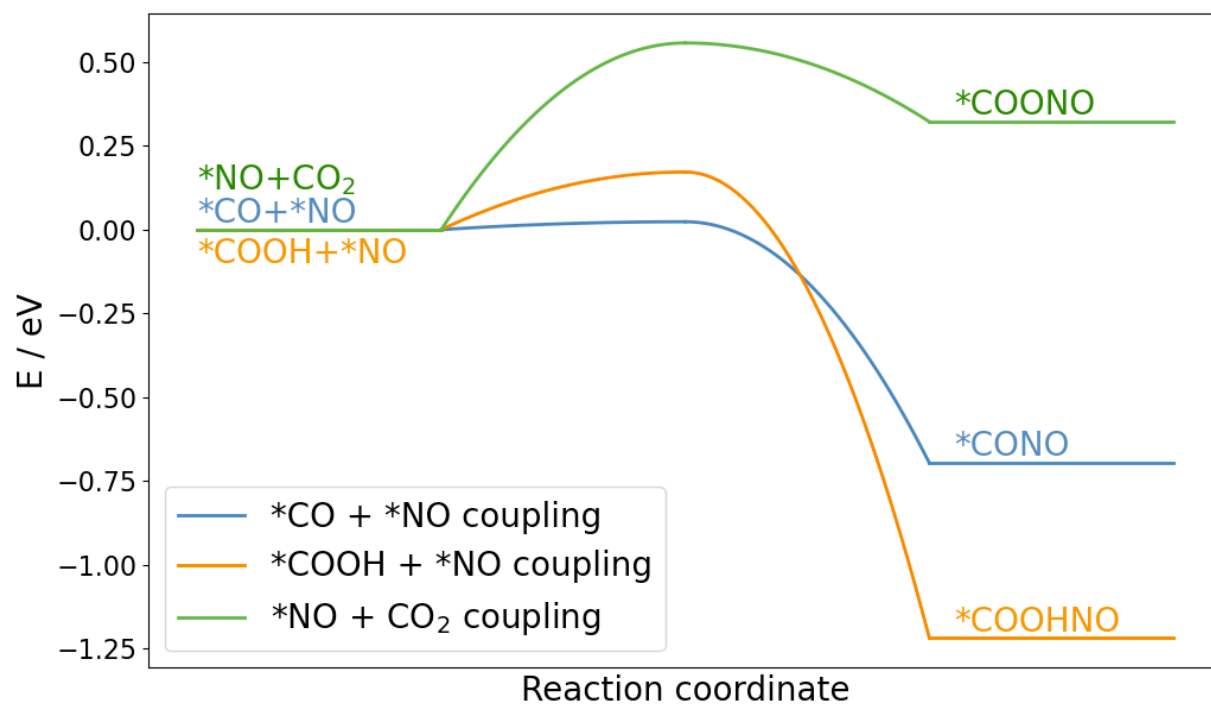

Figure S12: First C-N bond formation barrier on Ag(100)

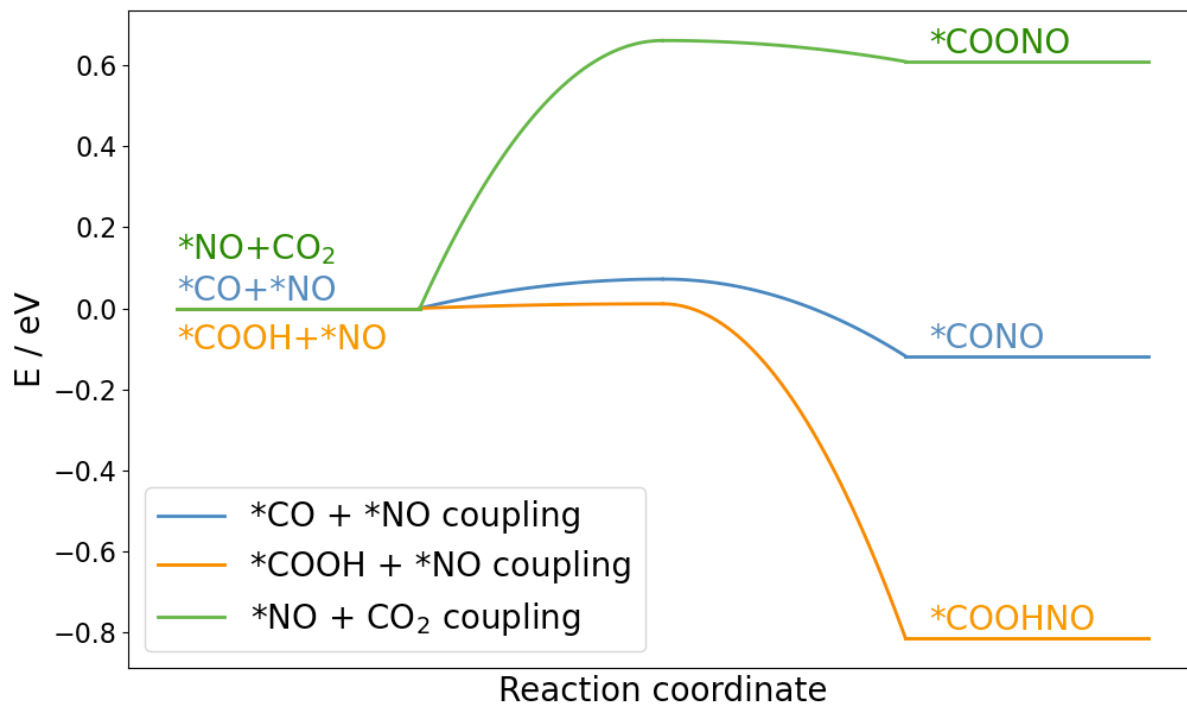

Figure S13: First C-N bond formation barrier on Ag(111)

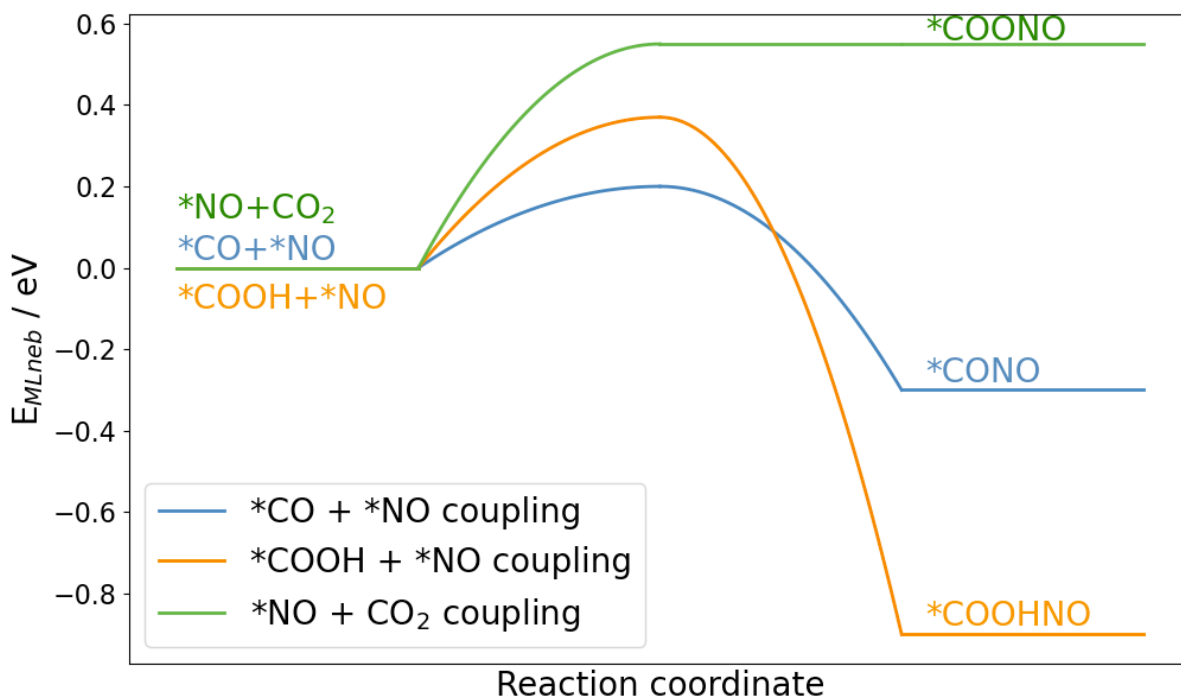

Figure S14: First C-N bond formation barrier on Ag(110)

The values of Coupling barriers on Figure S12 and Figure S13 were calculated using traditional DFT Nudge elastic Band (NEB) method. On Figure S14, the coupling barriers ( $E_{MLneb}$ ) were estimated using Machine learning ML potentials from the Open catalyst Project (OCP) which has been known to be in good agreement with DFT values.<sup>17, 18</sup> This method was used due to the larger size of the Ag (110) system due to convergence and computational cost issues with the traditional DFT methods.

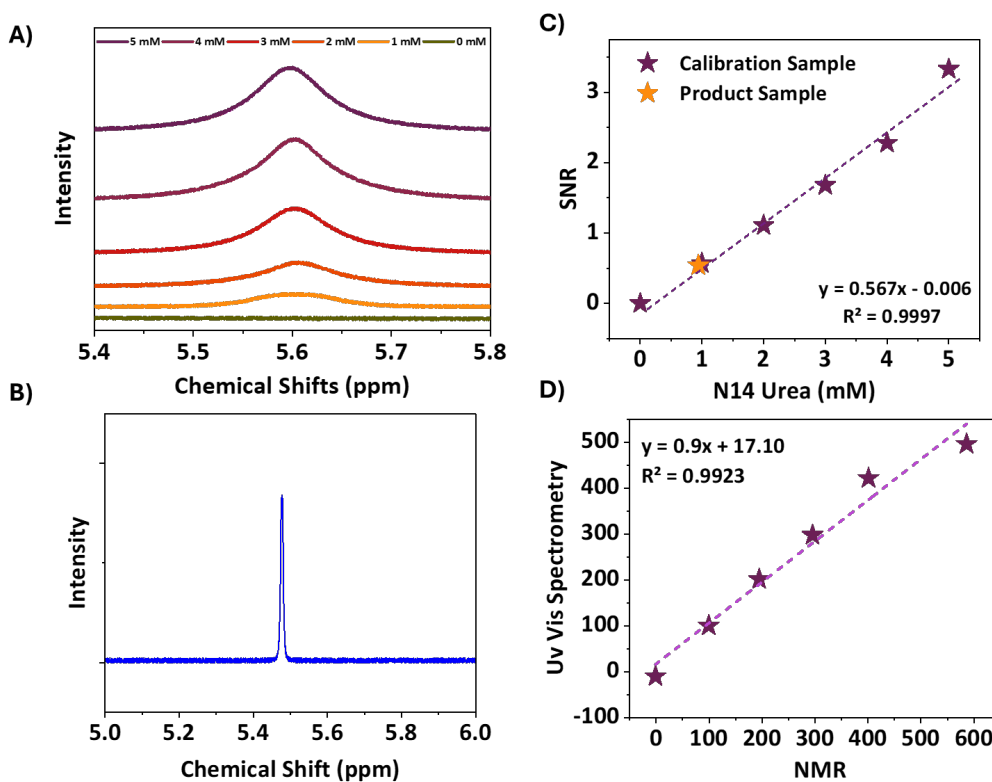

**Figure S15:** A) NMR spectra of urea calibration solutions B) Calibration plot for N14 Urea samples C) 1-H NMR spectrum of post electrolysis sample showing a peak at a chemical shift of 5.5 ppm corresponding to urea and the FE is estimated to be ~98% D) Parity plot for NMR vs UV-vis spectrometry.



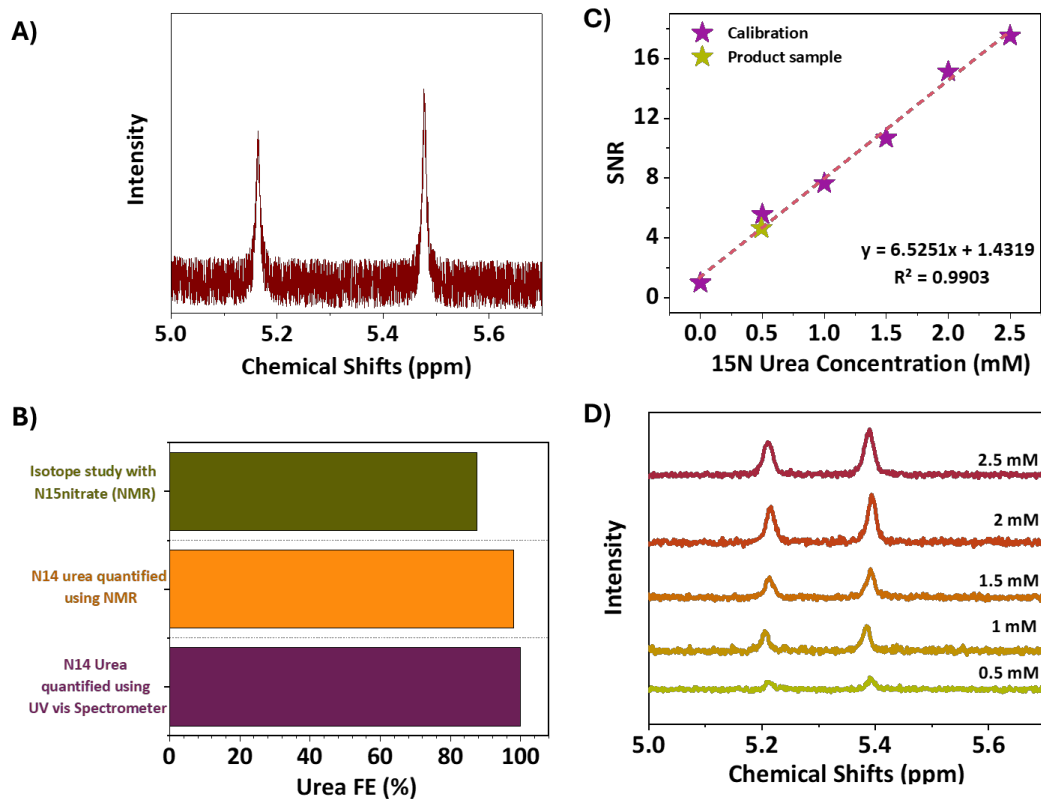

**Figure S16:** (A)  $^1\text{H}$  NMR spectra of the post-electrolysis solution using  $^{15}\text{KNO}_3$ . The doublet observed indicates the presence of  $^{15}\text{N}$ -labeled urea. (B) Calibration graph for  $^{15}\text{N}$ -labeled urea solutions obtained using  $^1\text{H}$  NMR. (C) Comparison of Faradaic efficiencies (FE) in the isotope-labeled study, with  $^{14}\text{N}$  urea quantification performed using both  $^1\text{H}$  NMR and UV-Vis spectrometry. (D)  $^1\text{H}$  NMR spectra of the calibration solutions for  $^{15}\text{N}$ -labeled urea.

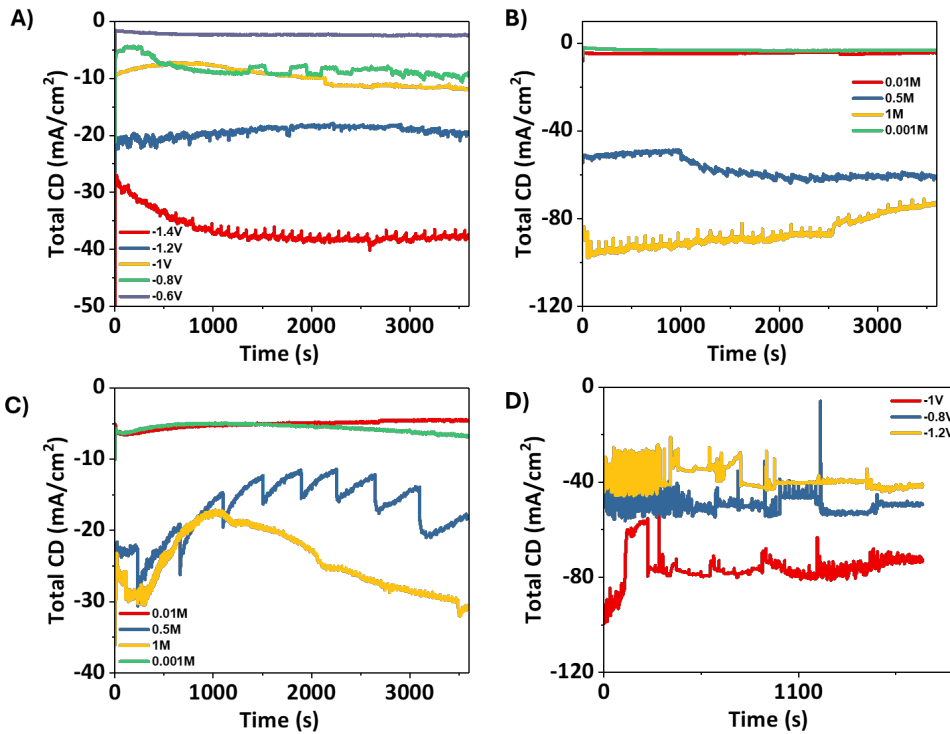

**Figure S17:** A) Current versus time data for the study on the effect of applied potential (all potentials referenced against RHE). B) Current versus time data showing the effect of varying KNO<sub>3</sub> concentration while keeping KHCO<sub>3</sub> constant at 0.1 M. C) Current versus time data illustrating the effect of varying KHCO<sub>3</sub> concentration while maintaining KNO<sub>3</sub> constant at 0.1 M. D) Current versus time data for the AgGDE (Ag Gas Diffusion Electrode) setup.

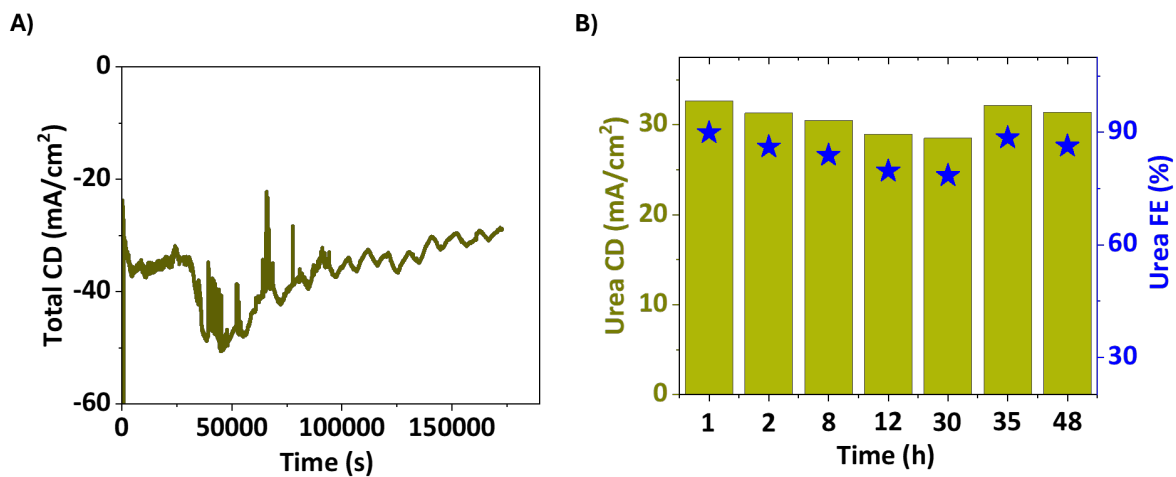

**Figure S18:** (A) Current versus time data demonstrating the 48-hour stability of the electrochemical setup. B) Faradaic efficiency (FE) for urea production and current densities (CDs) over time during the 48-hour stability test.

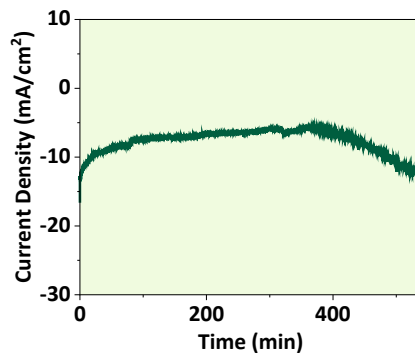

**Figure S19:** Current vs time data for 9 hour stability analysis

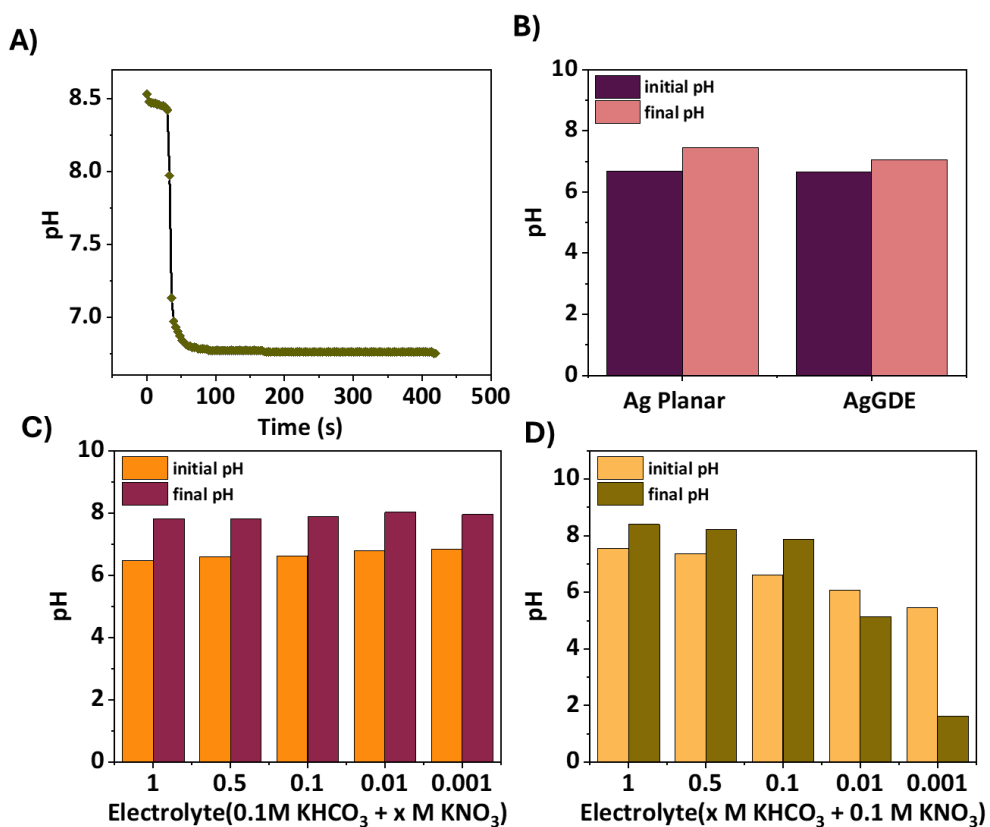

**Figure S20:** A) Change in pH with time while equilibrating electrolyte (0.1M KNO<sub>3</sub>+ 0.1M KHCO<sub>3</sub>) with gaseous CO<sub>2</sub>. B) Initial pH and post reaction pH of electrolyte in Ag planar set up and Ag GDE set up. C) Initial pH and post reaction pH of electrolyte with varying KNO<sub>3</sub> concentration. D) Initial pH and post reaction pH of electrolyte with varying KHCO<sub>3</sub> concentration

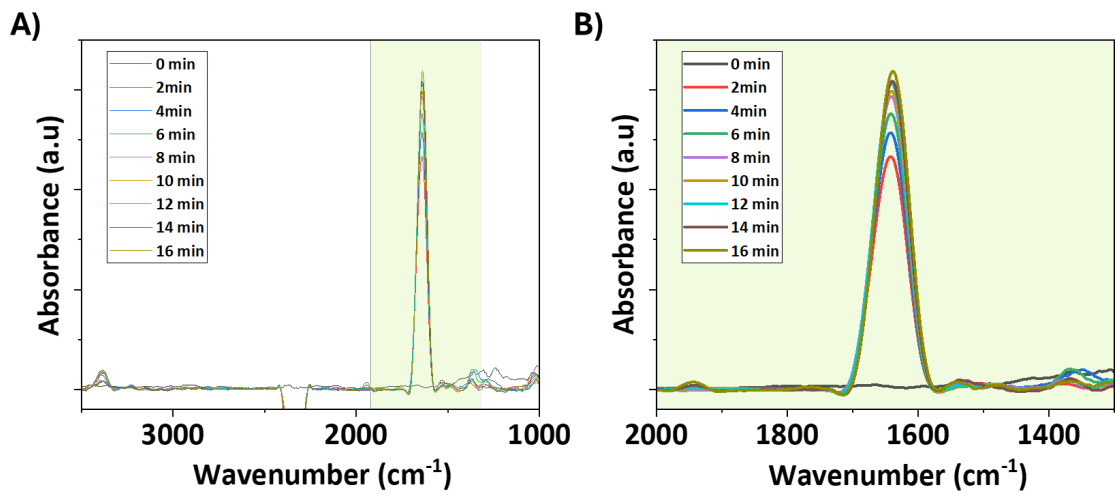

**Figure S21:** A) FTIR spectra showing stabilized state of CO intermediate B) Zoomed in version of spectra A)

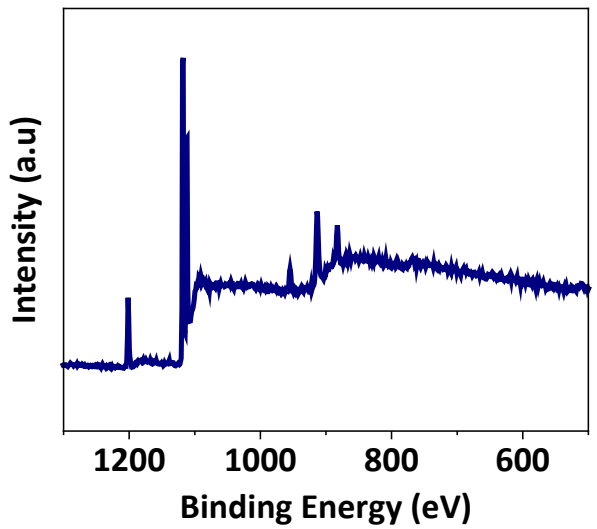

**Figure S22:** XPS survey scan for Ag planar electrode post electrolysis

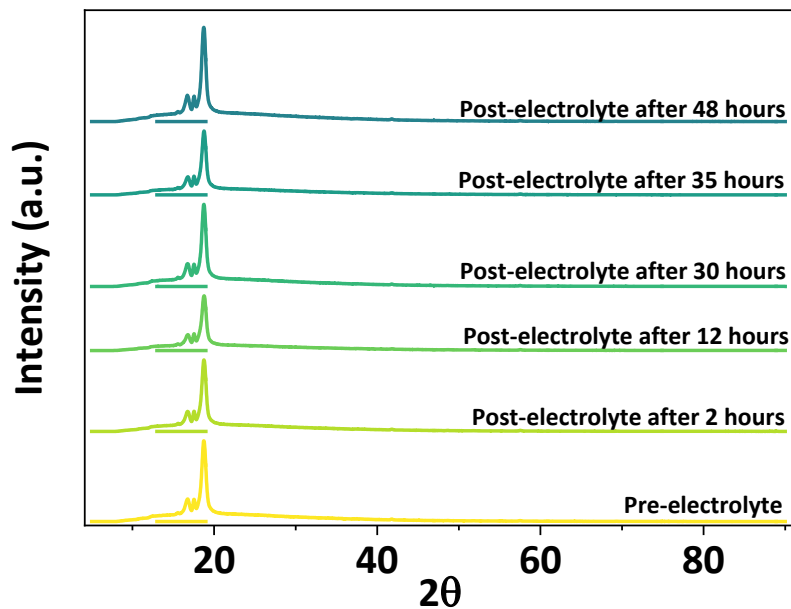

Figure S23: XRF analysis on post electrolysis samples during 48 hour stability test

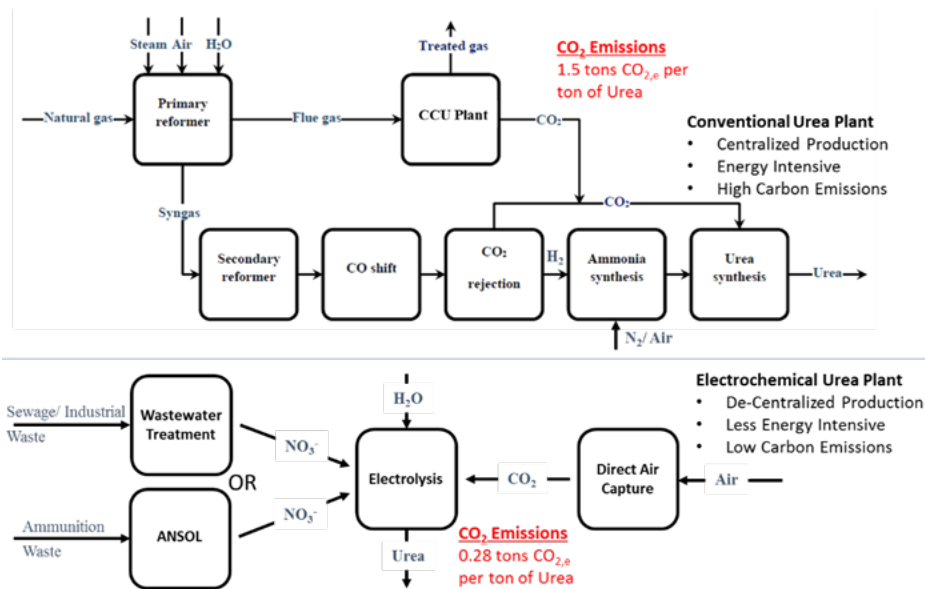

Figure S24: Block diagram of process flow for conventional urea plant and the the proposed electrochemical urea plant that utilizes waste nitrates and CO<sub>2</sub>.

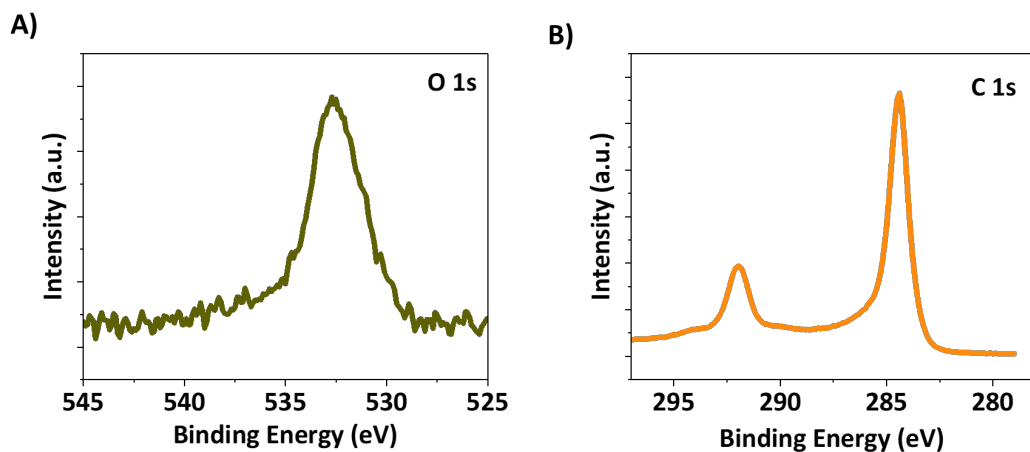

**Figure S25:** XPS of bare carbon substrate: A) O1s spectra B) C1s spectra

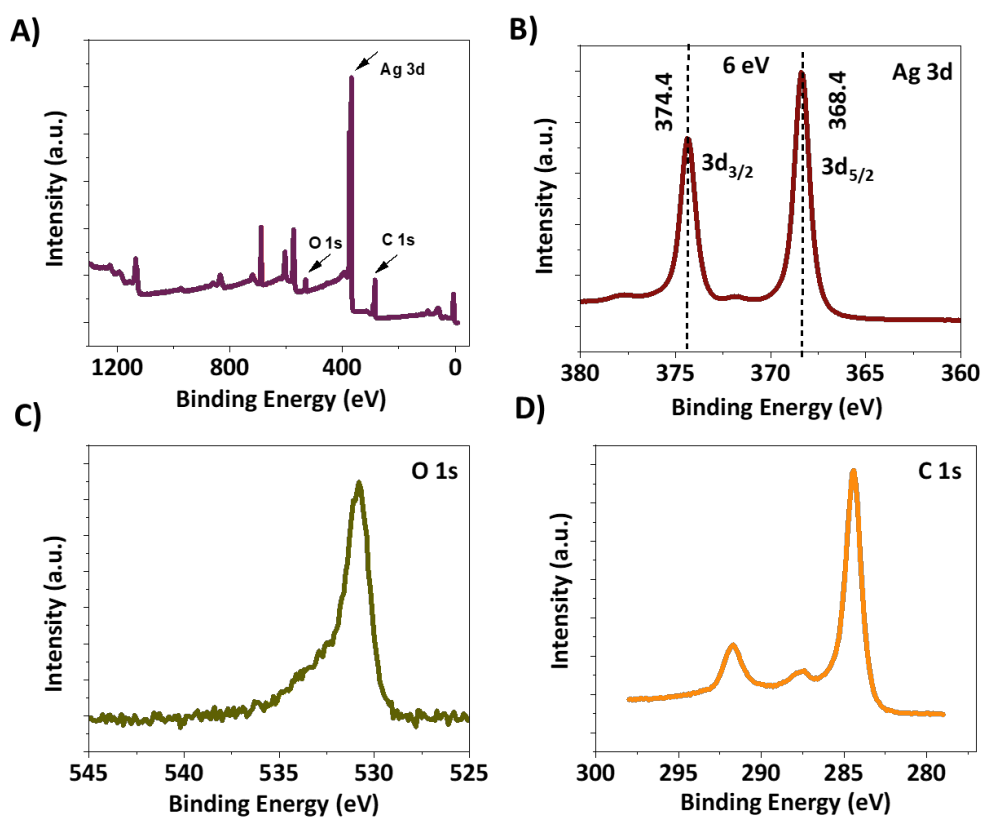

**Figure S26:** XPS of Pre electrolysis AgGDE: A) Survey Scan B) Ag 3d spectra C) O 1s spectra D) C 1s spectra

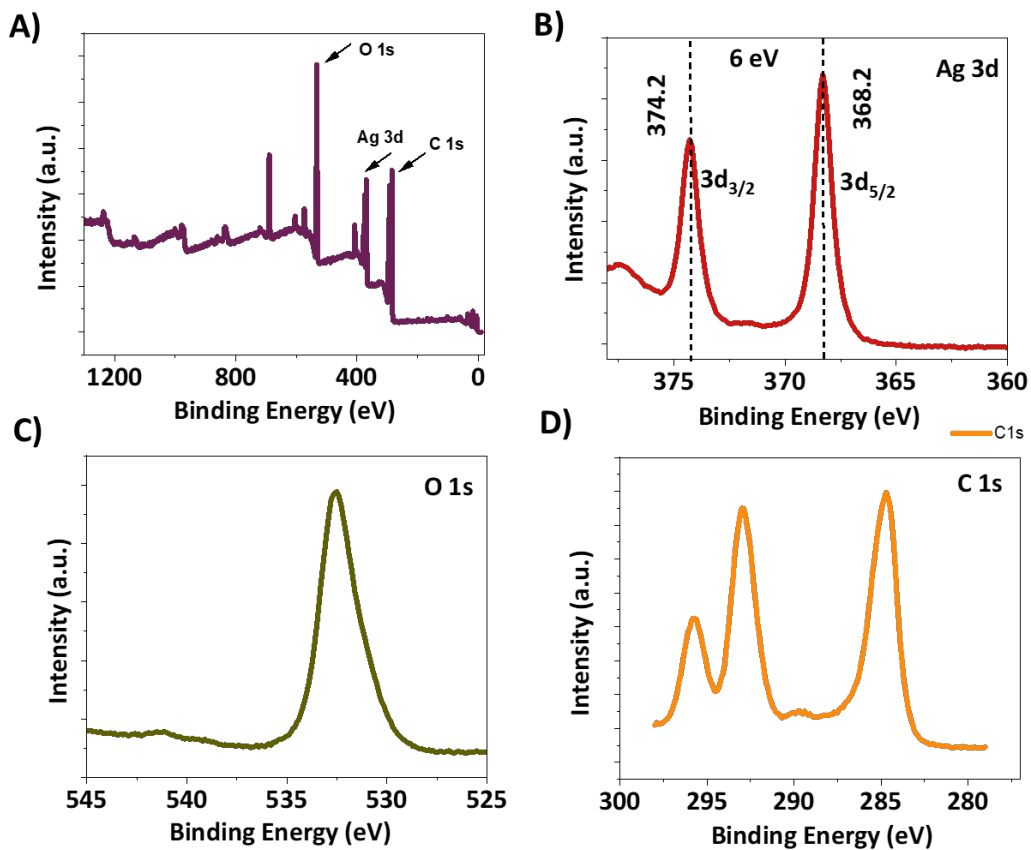

Figure S27: XPS of Post electrolysis AgGDE: A) Survey Scan B) Ag 3d spectra C) O 1s spectra D) C 1s spectra

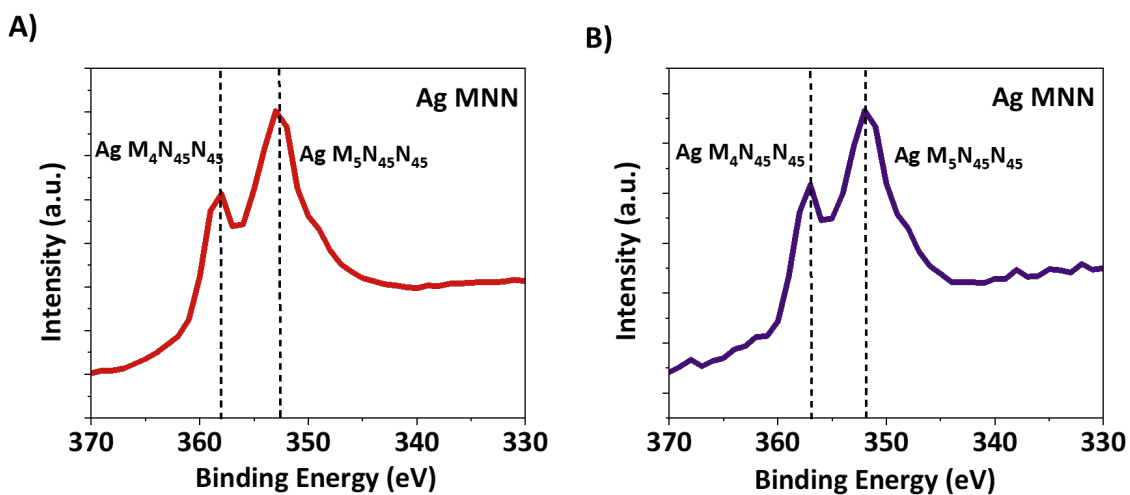

Figure S28: Auger Spectra: A) Ag MNN for pre-electrolysis AgGDE B) Ag MNN for post-electrolysis AgGDE

## References

1. M. Yuan, J. Chen, Y. Bai, Z. Liu, J. Zhang, T. Zhao, Q. Shi, S. Li, X. Wang and G. Zhang, *Chemical Science*, 2021, **12**, 6048-6058.
2. M. Yuan, J. Chen, Y. Bai, Z. Liu, J. Zhang, T. Zhao, Q. Wang, S. Li, H. He and G. Zhang, *Angewandte Chemie*, 2021, **133**, 11005-11013.
3. Y. Feng, H. Yang, Y. Zhang, X. Huang, L. Li, T. Cheng and Q. Shao, *Nano Letters*, 2020, **20**, 8282-8289.
4. M. Shibata and N. Furuya, *Journal of Electroanalytical Chemistry*, 2001, **507**, 177-184.
5. J. Leverett, T. Tran-Phu, J. A. Yuwono, P. Kumar, C. Kim, Q. Zhai, C. Han, J. Qu, J. Cairney and A. N. Simonov, *Advanced Energy Materials*, 2022, **12**, 2201500.
6. M. Shibata, K. Yoshida and N. Furuya, *Journal of Electroanalytical Chemistry*, 1998, **442**, 67-72.
7. C. Lv, C. Lee, L. Zhong, H. Liu, J. Liu, L. Yang, C. Yan, W. Yu, H. H. Hng and Z. Qi, *ACS nano*, 2022.
8. C. Lv, L. Zhong, H. Liu, Z. Fang, C. Yan, M. Chen, Y. Kong, C. Lee, D. Liu and S. Li, *Nature Sustainability*, 2021, **4**, 868-876.
9. M. Shibata, K. Yoshida and N. Furuya, *Journal of the Electrochemical Society*, 1998, **145**, 2348.
10. N. Meng, Y. Huang, Y. Liu, Y. Yu and B. Zhang, *Cell Reports Physical Science*, 2021, **2**, 100378.
11. R. Shi and T. Zhang, *Science China Chemistry*, 2020, **63**, 1580-1581.
12. Y. Huang, R. Yang, C. Wang, N. Meng, Y. Shi, Y. Yu and B. Zhang, *ACS Energy Letters*, 2021, **7**, 284-291.
13. C. Chen, X. Zhu, X. Wen, Y. Zhou, L. Zhou, H. Li, L. Tao, Q. Li, S. Du and T. Liu, *Nature chemistry*, 2020, **12**, 717-724.
14. X. Zhang, X. Zhu, S. Bo, C. Chen, M. Qiu, X. Wei, N. He, C. Xie, W. Chen and J. Zheng, *Nature Communications*, 2022, **13**, 5337.
15. D. Saravanakumar, J. Song, S. Lee, N. H. Hur and W. Shin, *ChemSusChem*, 2017, **10**, 3999-4003.
16. J. Mukherjee, S. Paul, A. Adalder, S. Kapse, R. Thapa, S. Mandal, B. Ghorai, S. Sarkar and U. K. Ghorai, *Advanced Functional Materials*, 2022, **32**, 2200882.
17. R. Tran, J. Lan, M. Shuaibi, B. M. Wood, S. Goyal, A. Das, J. Heras-Domingo, A. Kolluru, A. Rizvi and N. Shoghi, *ACS Catalysis*, 2023, **13**, 3066-3084.
18. L. Chanussot, A. Das, S. Goyal, T. Lavril, M. Shuaibi, M. Riviere, K. Tran, J. Heras-Domingo, C. Ho and W. Hu, *Acs Catalysis*, 2021, **11**, 6059-6072.
